# Supplementary material for: Structure and Function of Rhizosphere Soil and Root Endophytic Microbial Communities Associated With Root Rot of Panax notoginseng
Source: PubMed Central journal article supplement (PMC8766989; doi:10.3389/fpls.2021.752683), 2022-01-05

A

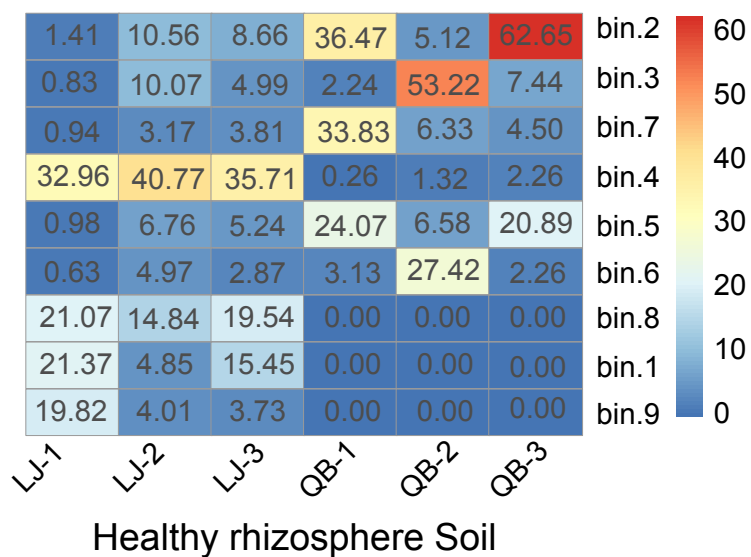

B

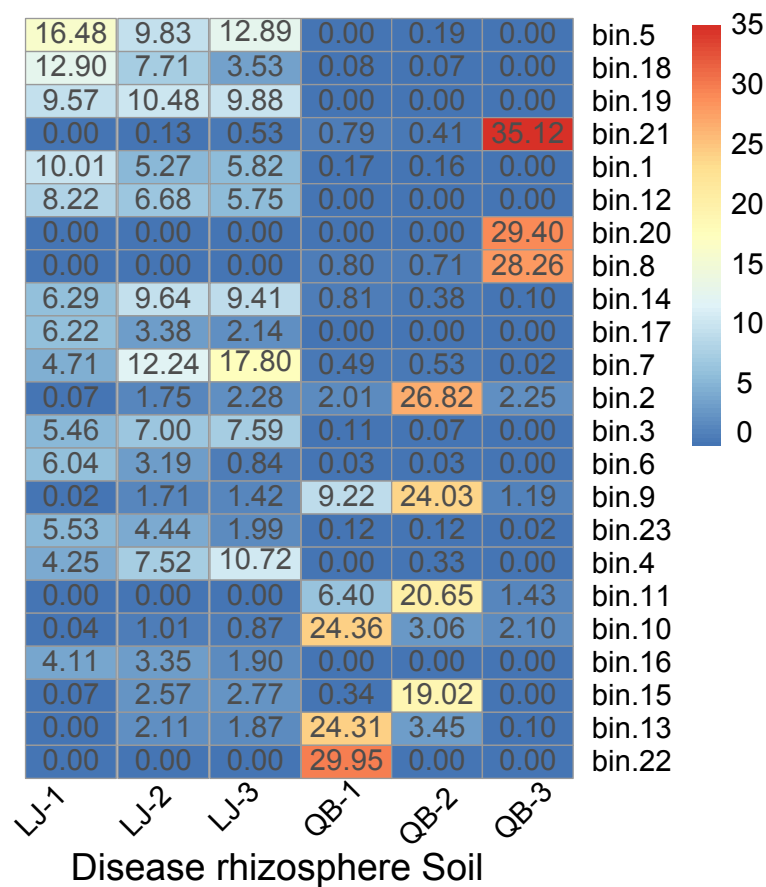

C

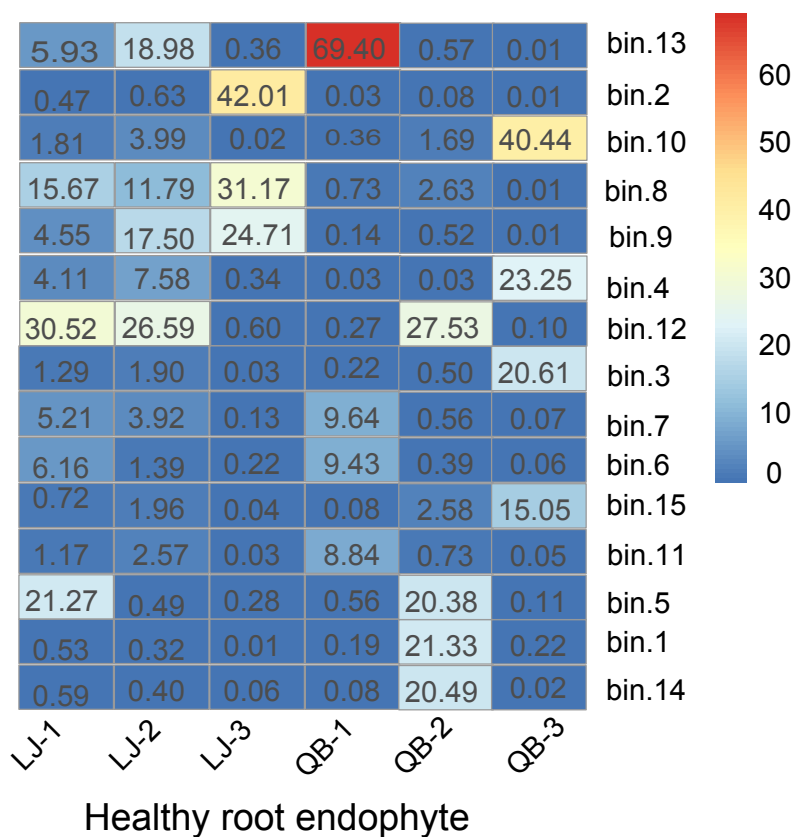

D

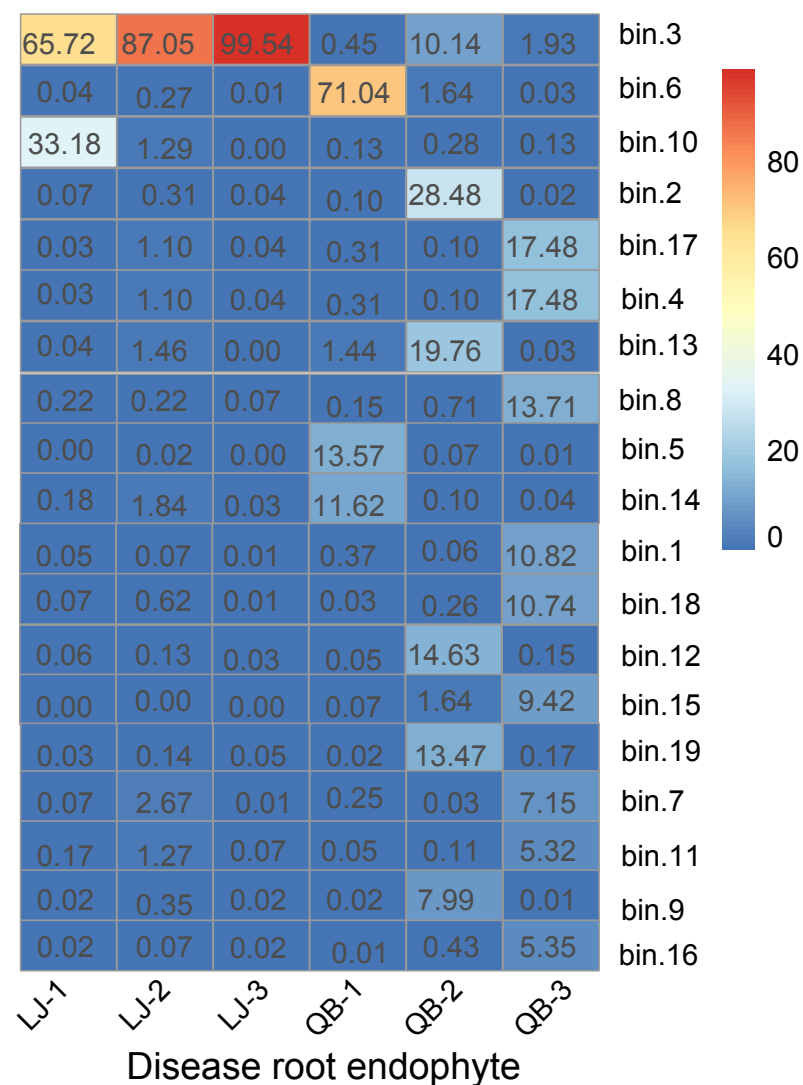

Supplement: Image_4.pdf [file Image_4.pdf]
